## Age at Menarche in Relation to Adult Height

### The EPIC Study

N. C. Onland-Moret<sup>1</sup>, P. H. M. Peeters<sup>1</sup>, C. H. van Gils<sup>1</sup>, F. Clavel-Chapelon<sup>2</sup>, T. Key<sup>3</sup>,  
A. Tjønneland<sup>4</sup>, A. Trichopoulou<sup>5</sup>, R. Kaaks<sup>6</sup>, J. Manjer<sup>7</sup>, S. Panico<sup>8</sup>, D. Palli<sup>9</sup>, B. Tehard<sup>2</sup>,  
M. Stoikidou<sup>5</sup>, H. B. Bueno-De-Mesquita<sup>10</sup>, H. Boeing<sup>11</sup>, K. Overvad<sup>12</sup>, P. Lenner<sup>13</sup>, J. R. Quirós<sup>14</sup>,  
M. D. Chirlaque<sup>15</sup>, A. B. Miller<sup>16</sup>, K. T. Khaw<sup>17</sup>, and E. Riboli<sup>6</sup>

<sup>1</sup> Julius Center for Health Sciences and Primary Care, University Medical Center Utrecht, Utrecht, the Netherlands.

<sup>2</sup> E3N-EPIC Group, Institute Gustav Roussy, National Institute for Health and Medical Research (INSERM), Villejuif, France.

<sup>3</sup> Cancer Research UK Epidemiology Unit, University of Oxford, Oxford, United Kingdom.

<sup>4</sup> Institute of Cancer Epidemiology, Danish Cancer Society, Copenhagen, Denmark.

<sup>5</sup> Department of Hygiene and Epidemiology, Medical School, University of Athens, Athens, Greece.

<sup>6</sup> International Agency for Research on Cancer (IARC), Lyon, France.

<sup>7</sup> Department of Community Medicine, Malmö University Hospital, Malmö, Sweden.

<sup>8</sup> Dipartimento di Medicina Clinica e Sperimentale, Università Federico II, Naples, Italy.

<sup>9</sup> Molecular and Nutritional Epidemiology Unit, Centro per lo Studio e la Prevenzione Oncologica, Istituto Scientifico della Regione Toscana, Florence, Italy.

<sup>10</sup> Centre for Nutrition and Health, National Institute for Public Health and Environment, Bilthoven, the Netherlands.

<sup>11</sup> Department of Epidemiology, German Institute of Human Nutrition, Bergholz-Rehbrücke, Germany.

<sup>12</sup> Department of Clinical Epidemiology, Aalborg Hospital, Aarhus University Hospital, Aalborg, Denmark.

<sup>13</sup> Department of Oncology, Umeå University, Umeå, Sweden.

<sup>14</sup> Public Health and Health Planning Directorate, Asturias, Spain.

<sup>15</sup> Epidemiology Department, Regional Health Council, Murcia, Spain.

<sup>16</sup> Division of Clinical Epidemiology, Deutsches Krebsforschungszentrum, Heidelberg, Germany.

<sup>17</sup> Clinical Gerontology Unit, University of Cambridge, Cambridge, United Kingdom.

Received for publication August 15, 2002; accepted for publication April 29, 2005.

In the last two centuries, age at menarche has decreased in several European populations, whereas adult height has increased. It is unclear whether these trends have ceased in recent years or how age at menarche and height are related in individuals. In this study, the authors first investigated trends in age at menarche and adult height among 286,205 women from nine European countries by computing the mean age at menarche and height in 5-year birth cohorts, adjusted for differences in socioeconomic status. Second, the relation between age at menarche and height was estimated by linear regression models, adjusted for age at enrollment between 1992 and 1998 and socioeconomic status. Mean age at menarche decreased by 44 days per 5-year birth cohort ( $\beta = -0.12$ , standard error = 0.002), varying from 18 days in the United Kingdom to 58 days in Spain and Germany. Women grew 0.29 cm taller per 5-year birth cohort (standard error = 0.007), varying from 0.42 cm in Italy to 0.98 cm in Denmark. Furthermore, women grew approximately 0.31 cm taller when menarche occurred 1 year later (range by country: 0.13–0.50 cm). Based on time trends, more recent birth cohorts have their menarche earlier and grow taller. However, women with earlier menarche reach a shorter adult height compared with women who have menarche at a later age.

body height; Europe; menarche

Abbreviations: EPIC, European Prospective Investigation into Cancer and Nutrition; SD, standard deviation.

Correspondence to N. C. Onland-Moret, Julius Center for General Practice and Patient Oriented Research, Room Str-6.119, University Medical Center Utrecht, P.O. Box 85500, 3508 GA Utrecht, the Netherlands (e-mail: N.C.Onland@jc.azu.nl).

Several risk factors for breast cancer have been identified, including age at menarche and adult height. Studies have consistently shown that women having their menarche at an earlier age have an increased risk for breast cancer compared with women who had their menarche at a later age (1–6). A decrease of 9 percent in premenopausal breast cancer risk was found for each additional year menarche occurred later. This decrease was approximately 4 percent when breast cancer was diagnosed after menopause (6). A recent pooled analysis of seven prospective cohort studies investigating the role of height as a risk factor for breast cancer showed a significant increased risk of breast cancer with increasing height in postmenopausal, but not in premenopausal, women (7).

Since the early 19th century, secular changes have been described for age at menarche as well as for adult height. In Europe, age at menarche has decreased, although the results from the past 50 years are less consistent (8). In several countries, age at menarche remained stable or has even started to increase since the mid 20th century (9–11), whereas in other countries the downward trend still continues (12, 13). In the same period, height has increased by about 0.3–3.0 cm per decade over the last century (8, 9, 14). Hauspie et al. (8) claim that the secular trend in height has slowed down since World War II, but others (14) could not confirm this finding. Secular trends in these established risk factors for breast cancer may also predict changes in breast cancer incidence and are therefore important to monitor. Although on an ecologic (population) level women seem to have their menarche earlier and to grow taller, several studies show that women with earlier menarche reach a shorter adult height compared with women who have menarche at a later age (1, 12, 15–19).

The aim of this paper is to describe secular trends in age at menarche and height in the past century and to investigate whether adult height is related to the age at which menarche occurs. For this purpose, we used individual data on 286,205 women who participated in the European Prospective Investigation into Cancer and Nutrition (EPIC). The large number of women included and the fact that we have data from nine different European countries participating in this cohort give us the opportunity to investigate trends in age at menarche and adult height in different countries, as well as the relation between these two characteristics.

## MATERIALS AND METHODS

### Subjects

The EPIC study is a multicenter prospective study carried out in 23 study centers from 10 European countries. In the present study, only data from the female EPIC participants of nine countries were used ( $n = 307,081$ ). At the time of the current analysis, data from Norway had not yet been included in the central database. A detailed description of the study population and data collection of the EPIC study has been published elsewhere (20). In short, the study includes 307,081 women, aged 35–70 years. Women were recruited between 1992 and 1998, and information was collected through a nondietary questionnaire on lifestyle

variables and through a dietary questionnaire addressing usual diet. Anthropometric measurements were obtained, and blood samples were taken. The EPIC study was not intended to include a representative study population of each country, and the selection of study populations in each country was influenced by practical considerations of obtaining adequate participation and ensuring long-term follow-up.

### Assessment of age at menarche, height, and leg length

In all countries, age at menarche was obtained from the general lifestyle questionnaire. In Sweden, Italy, the Netherlands, United Kingdom, and Greece, age at menarche was asked in years (open question). In other countries (Denmark, Spain, Germany, France), age at menarche was asked in predefined categories ( $\leq 8$ , 9, 10, ..., 19, or  $> 19$  years). Age at menarche was missing for 0.1–4.3 percent of women per country. An exception was Sweden, where 44 percent of the subjects had missing values on age at menarche because one of the two centers did not obtain this information for its participants.

Trained observers using standardized methods measured height to the nearest 10 mm in Spain, Sweden, the Oxford, United Kingdom, subcohort, and Denmark; to the nearest 5 mm in the Netherlands, France, the Norfolk, United Kingdom, subcohort, and three of the Italian cohorts; and to the nearest 1 mm in two Italian subcohorts, Greece, and Germany. In global France and in the Oxford, United Kingdom, subcohort, height was self-reported by participating women and measured only in a subsample (29 percent in France and 40 percent in the United Kingdom). Self-reported height is generally overestimated, especially in shorter subjects (21). By use of a method designed by Haftenberger et al. (21), we calculated measured height from the self-reported values for those women from the Oxford, United Kingdom, subcohort for whom only self-reported height was available. The formula was obtained through comparison of the women for whom self-reported height and measured height were both available (1,464 women). The following formula was used: measured height (cm) =  $(27.096 + (0.853 \times \text{self-reported height}) - (0.069 \times \text{age}))$ . For the French women with both self-reported and measured data, the time interval between self-reports and measurements varied between less than 1 month and 6 years. The maximum time interval considered necessary by Haftenberger et al. (21) to allow for a reasonable comparison of self-reported and measured values was 3 months. Because of an insufficient number of eligible women in this time interval, prediction equations from self-reports were not determined (21). In this paper, we therefore present self-reported values for the French women. For 1,857 women, only measured height (not self-reported height) was available in France. These women were not included in the analyses on trends in height and in the analyses on the relation between height and age at menarche.

Sitting height was measured in Italy, Spain, the Utrecht cohort from the Netherlands, Greece, Germany, Denmark, and the subsample from France in which height was measured as well, while participants were seated on a chair.

Sitting height was then measured from the head to the seat of the chair to the nearest 10 mm in France and Greece and to the nearest 1 mm in all other cohorts. Because the onset of ovarian estrogen production (at menarche) is thought to affect the growth of the long bones in particular (18, 19), the use of leg length might be more appropriate to describe the effect of menarche on growth. Therefore, we estimated leg length by subtracting the sitting height from the total body height (leg length = height – sitting height). Data on height were missing for 0.1–1.7 percent of women per country.

### Statistical analysis

The analyses were restricted to women who had nonmissing data on height as well as menarche and who had their menarche at a physiologic age, which we defined as menarche from age 8 until 18 years ( $n = 286,205$ ).

For the description of trends, mean age at menarche and height were plotted in 5-year birth cohorts. The oldest cohort includes women born from 1915 to 1919, and the youngest women were born from 1960 to 1964. Because socioeconomic status varied considerably among countries and, especially, mean height varied considerably along the different categories of socioeconomic status, we plotted the socioeconomic status-adjusted mean values of menarche and height. We used the highest school level reached as a proxy for the socioeconomic status of a woman in her youth. Women with no education or only primary school education were classified as “low,” women who completed secondary school or technical/professional school were classified as “intermediate,” and women with a university degree were classified as having a “high” socioeconomic status. Trends were tested using a linear regression model in which the 5-year birth cohort was entered continuously as the independent variable, and either age at menarche (in years) or height (in cm) was entered as the dependent variable;  $p$  values are reported. Linearity was assessed by plotting the partial residual plots. Again, the analyses were adjusted for socioeconomic status. For three countries (the Netherlands, Germany, and France), the plots showed that trends for height were only linear starting from the 1935–1939 birth cohort, and the linear trend was, therefore, tested only from this birth cohort until the last.

We calculated the difference between the  $r^2$  of the full model omitting age at menarche and the  $r^2$  of the full model in order to estimate the percentage of the total variation in height explained by variation in age at menarche.

Since we believe that the worsened living conditions during World War II had a marked influence on age at menarche (22) and on height (23), we decided to analyze the relation between age at menarche and adult height separately for women born before 1945 and from 1945 onward. By use of this cutoff point, we ensure that the latter group is not exposed to the effects of World War II at any time in their life, whereas these effects could influence the relations found in the first group. In order to see whether the relations differed in different countries, we stratified the analyses by country.

### RESULTS

The reported mean age at menarche in Europe varies from 12.5 (standard deviation (SD): 1.5) years in Italy to 13.6 (SDs: 1.4 and 1.5) years in Sweden and Denmark (table 1). In all participating European countries, a statistically significant downward trend in the mean age at menarche per 5 years is observed (figure 1). The linear regression coefficients ( $\beta$ s) ranged from  $-0.05$  in the United Kingdom to  $-0.16$  in Spain and Germany ( $p < 0.0001$  in all countries). For example, a  $\beta$  coefficient of  $-0.05$  means that, for each subsequent 5-year birth cohort, menarche occurs 0.05 year ( $\approx 18$  days) earlier. From figure 1, a stabilization or even a slight increase in the age at menarche of the younger birth cohorts can be observed in the United Kingdom, Germany, Italy, and Spain.

In France, Germany, and the Netherlands, a sharp increase in the mean age at menarche was seen in women born between 1920 and 1934. From 1935 onward, the mean age at menarche started to decline in these countries as well (the Netherlands:  $\beta_{1935-1964} = -0.11$ ,  $p < 0.0001$ ; France:  $\beta_{1935-1964} = -0.09$ ,  $p < 0.0001$ ; Germany:  $\beta_{1935-1964} = -0.16$ ,  $p < 0.0001$ ).

For height, too, there is a large variation in Europe, with Dutch women being the tallest (mean height (cm): 164.4, SD: 6.3) and Greek women being the shortest (mean height (cm): 156.1, SD: 6.4) (table 1). Figure 2 shows that the mean height for women has increased in all nine European countries, with a range by country from 0.42 cm in Italy to 0.98 cm in Denmark per 5-year birth cohort. For the birth cohort 1920–1924, the tallest women (the Netherlands) and the shortest women (Greece) were on average 162.2 cm and 153.3 cm, respectively. For younger women in the birth cohort 1960–1964, the mean adult height ranged from 166.0 cm for Dutch women to 158.6 cm for Spanish women. In several countries (the Netherlands, Greece, Spain, and Sweden), the increase in mean height appears to be leveling off in the younger birth cohorts.

To exclude any effects of World War II, we analyzed the relation between age at menarche and adult height stratified into two birth cohorts (women born before 1945 or from 1945 onward) and separately for each country (table 2). In general, we found that women who had their menarche at a later age reached a taller adult height; for example, for France, a delay of menarche by 1 year increased the adult body height by approximately 0.41 cm. For most countries except for the United Kingdom, Sweden, and Greece, this association was somewhat clearer in women born in 1945 or later. In Greece, a much weaker relation was found between age at menarche and adult height for the women born in 1945 or later ( $\beta_{<1945} = 0.31$  (95 percent confidence interval: 0.23, 0.38) vs.  $\beta_{\geq 1945} = 0.13$  (95 percent confidence interval: 0.02, 0.24)). In Sweden and the United Kingdom, the relation between age at menarche and adult height was similar over both strata of birth cohorts. Overall, the age at menarche explained about 1 percent of the variation in height. Most of the variation in height was explained by country of residence (13 percent). Age at intake and socioeconomic status explained 0.02 percent and 2 percent of the variation in height, respectively.

TABLE 1. Population characteristics by European country for women born between 1915 and 1964

| Country         | No.*    | Birth years included | Median age in years at recruitment (range) | Mean age in years at menarche (SD†) | Mean height in cm (SD) | Mean leg length in cm (SD) | Socioeconomic status |    |
|-----------------|---------|----------------------|--------------------------------------------|-------------------------------------|------------------------|----------------------------|----------------------|----|
|                 |         |                      |                                            |                                     |                        |                            | Level                | %  |
| France          | 70,913  | 1921–1956            | 51 (36–72)                                 | 12.84 (1.40)                        | 161.77 (5.65)          | 76.69 (4.70)               | Low                  | 12 |
|                 |         |                      |                                            |                                     |                        |                            | Intermediate         | 51 |
|                 |         |                      |                                            |                                     |                        |                            | High                 | 37 |
| Italy           | 31,559  | 1920–1962            | 51 (35–74)                                 | 12.54 (1.46)                        | 158.48 (6.15)          | 73.51 (4.31)               | Low                  | 30 |
|                 |         |                      |                                            |                                     |                        |                            | Intermediate         | 57 |
|                 |         |                      |                                            |                                     |                        |                            | High                 | 13 |
| Spain           | 25,241  | 1925–1961            | 47 (35–69)                                 | 12.91 (1.56)                        | 156.74 (5.82)          | 74.10 (4.97)               | Low                  | 79 |
|                 |         |                      |                                            |                                     |                        |                            | Intermediate         | 11 |
|                 |         |                      |                                            |                                     |                        |                            | High                 | 10 |
| United Kingdom  | 44,025  | 1918–1963            | 51 (35–74)                                 | 12.89 (1.54)                        | 162.51 (6.00)          |                            | Low                  | 27 |
|                 |         |                      |                                            |                                     |                        |                            | Intermediate         | 43 |
|                 |         |                      |                                            |                                     |                        |                            | High                 | 31 |
| The Netherlands | 25,414  | 1924–1962            | 54 (35–70)                                 | 13.28 (1.56)                        | 164.42 (6.26)          | 77.31 (4.59)               | Low                  | 20 |
|                 |         |                      |                                            |                                     |                        |                            | Intermediate         | 62 |
|                 |         |                      |                                            |                                     |                        |                            | High                 | 18 |
| Greece          | 14,428  | 1920–1964            | 54 (35–74)                                 | 13.19 (1.52)                        | 156.13 (6.44)          | 72.25 (4.47)               | Low                  | 65 |
|                 |         |                      |                                            |                                     |                        |                            | Intermediate         | 24 |
|                 |         |                      |                                            |                                     |                        |                            | High                 | 11 |
| Germany         | 29,669  | 1926–1963            | 48 (35–70)                                 | 13.16 (1.48)                        | 163.27 (6.22)          | 77.31 (4.23)               | Low                  | 30 |
|                 |         |                      |                                            |                                     |                        |                            | Intermediate         | 43 |
|                 |         |                      |                                            |                                     |                        |                            | High                 | 27 |
| Sweden          | 16,699  | 1923–1950            | 56 (44–73)                                 | 13.59 (1.41)                        | 163.65 (6.04)          |                            | Low                  | 39 |
|                 |         |                      |                                            |                                     |                        |                            | Intermediate         | 46 |
|                 |         |                      |                                            |                                     |                        |                            | High                 | 15 |
| Denmark         | 28,257  | 1929–1947            | 56 (50–65)                                 | 13.56 (1.53)                        | 164.11 (6.05)          | 77.52 (4.25)               | Low                  | 31 |
|                 |         |                      |                                            |                                     |                        |                            | Intermediate         | 62 |
|                 |         |                      |                                            |                                     |                        |                            | High                 | 7  |
| Total           | 286,205 | 1918–1964            | 52 (35–74)                                 | 13.03 (1.52)                        | 161.53 (6.53)          | 75.64 (4.88)               | Low                  | 31 |
|                 |         |                      |                                            |                                     |                        |                            | Intermediate         | 47 |
|                 |         |                      |                                            |                                     |                        |                            | High                 | 23 |

\* Number of women with nonmissing data on height and age at physiologic menarche, defined as menarche from age 8 to age 18 years.  
† SD, standard deviation.

The effect of age at menarche on leg length was similar to the relation between age at menarche and total body height (table 2).

DISCUSSION

The study presented here has several advantages. Never has there been a study on age at menarche and adult height as large as this one, including individual data on almost 300,000 women. Furthermore, the EPIC is unique in its design and size, covering nine European countries with a high degree of standardization in measuring anthropometric characteristics. There is also a large overlap of time

periods and cohorts covering each country. Therefore, in this study, we were able to compare trends among several European populations from north to south over several birth cohorts.

In all the nine European countries included in the present study, the mean age at menarche has been decreasing in women born since 1935. For several countries, the mean age at menarche had already started to decline from 1920 onward. Hauspie et al. (8) found a decrease in mean age at menarche of 4.5 months per decade in the years 1910–1970, which is slightly more compared with our findings (1–4 months per decade). Okasha et al. (12) reported a decrease in menarche in the United Kingdom of 6 months in women born between 1920 and 1951, which is also more than the

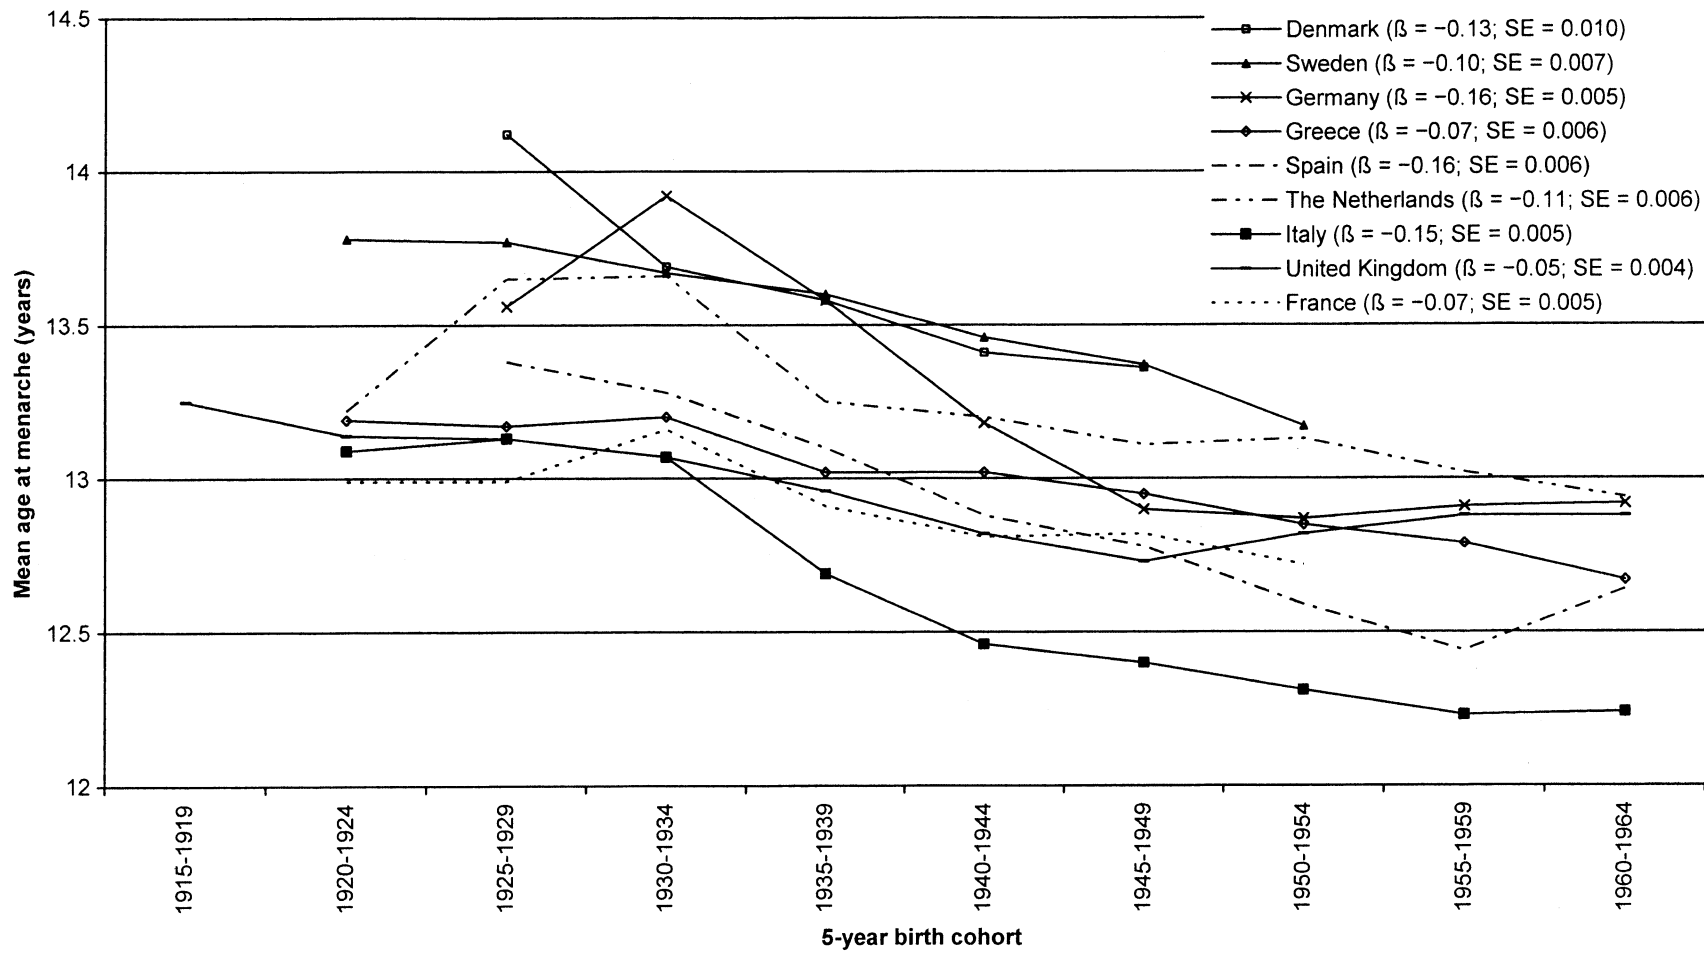

**FIGURE 1.** Mean age at menarche of women born between 1915 and 1964, adjusted for socioeconomic status, for 5-year birth cohorts for each participating country (Denmark, Sweden, Germany, Greece, Spain, the Netherlands, Italy, United Kingdom, and France).  $\beta$  is the country-specific regression coefficient from linear regression models, in which the independent variable is 5-year birth cohort and the dependent variable is age at menarche.  $p_{\text{trend}} < 0.0001$  for all countries. SE, standard error.

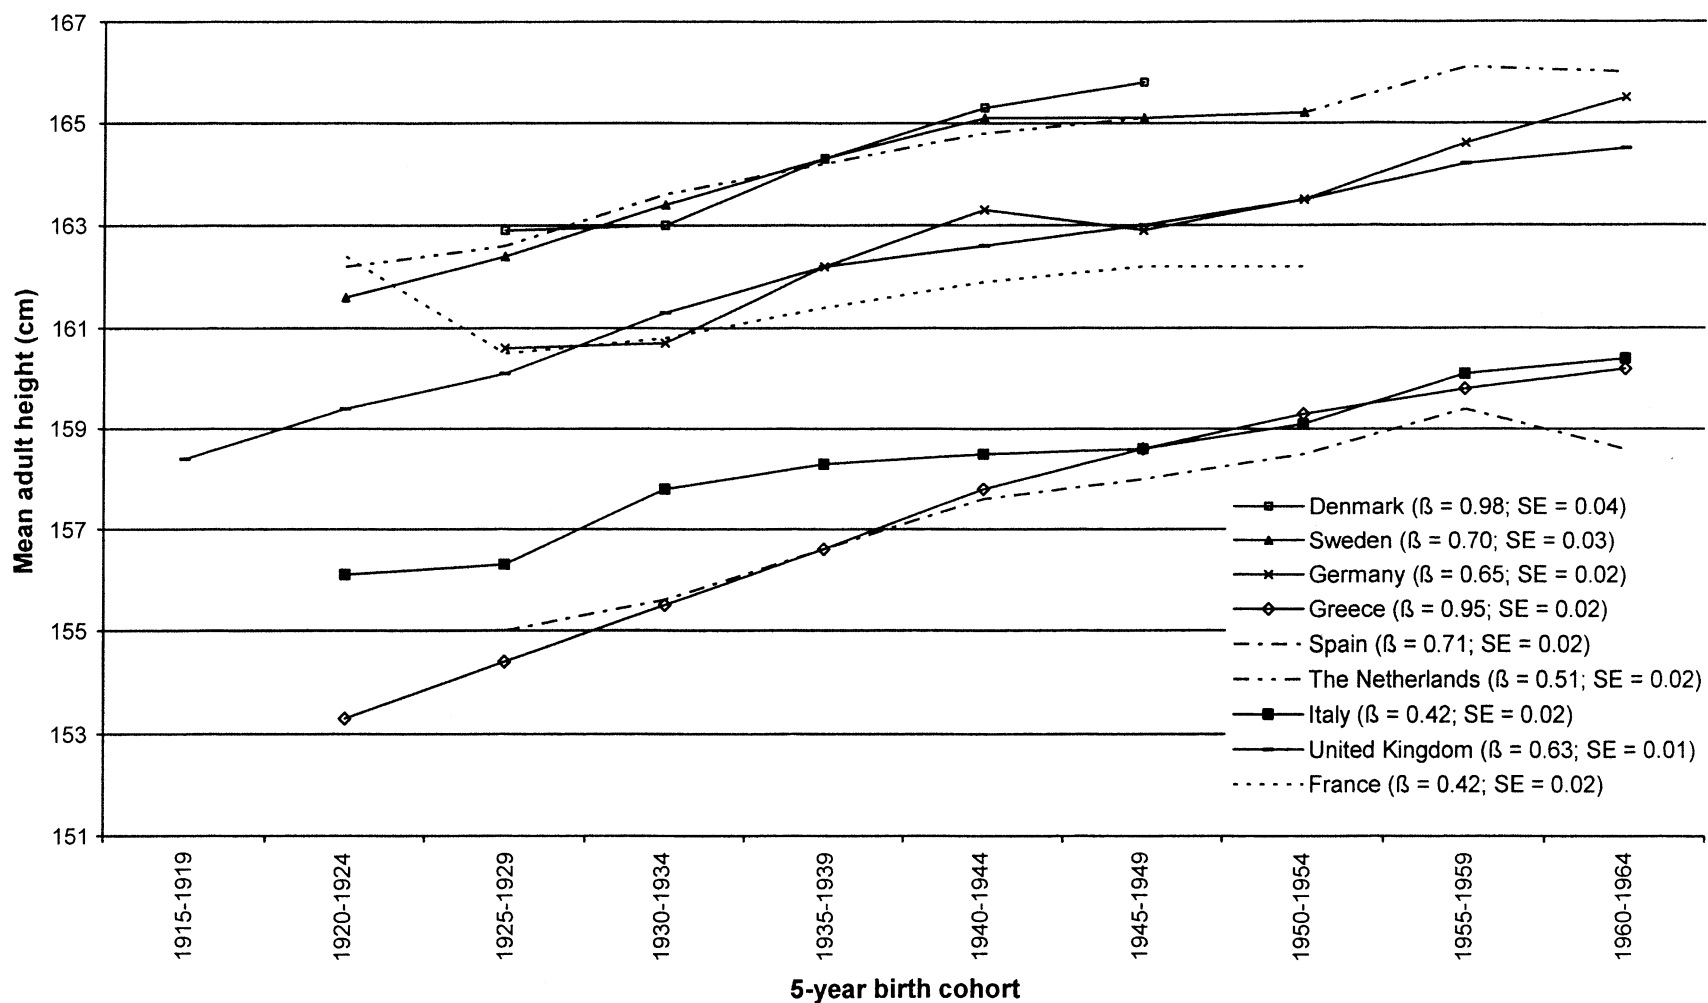

**FIGURE 2.** Mean height of women born between 1915 and 1964, adjusted for socioeconomic status, for 5-year birth cohorts for each participating country (Denmark, Sweden, Germany, Greece, Spain, the Netherlands, Italy, United Kingdom, and France).  $\beta$  is the country-specific regression coefficient from linear regression models, in which the independent variable is 5-year birth cohort and the dependent variable is height.  $p_{\text{trend}} < 0.0001$  for all countries. SE, standard error.

**TABLE 2. Regression coefficients for the association of adult height and leg length with age at menarche, adjusted for age at intake and socioeconomic status, stratified by European country and by the two birth cohorts before 1945 and from 1945 to 1964**

|                 | <1945                |                         | 1945–1964           |                         |
|-----------------|----------------------|-------------------------|---------------------|-------------------------|
|                 | $\beta$ coefficient* | 95% confidence interval | $\beta$ coefficient | 95% confidence interval |
| France          |                      |                         |                     |                         |
| Height          | 0.41                 | 0.37, 0.44              | 0.44                | 0.39, 0.49              |
| Leg length      | 0.41                 | 0.36, 0.47              | 0.47                | 0.39, 0.55              |
| Italy           |                      |                         |                     |                         |
| Height          | 0.36                 | 0.30, 0.43              | 0.50                | 0.43, 0.57              |
| Leg length      | 0.36                 | 0.32, 0.41              | 0.47                | 0.42, 0.52              |
| Spain           |                      |                         |                     |                         |
| Height          | 0.21                 | 0.14, 0.28              | 0.43                | 0.36, 0.49              |
| Leg length      | 0.27                 | 0.21, 0.33              | 0.42                | 0.37, 0.48              |
| United Kingdom  |                      |                         |                     |                         |
| Height          | 0.36                 | 0.31, 0.41              | 0.37                | 0.32, 0.43              |
| The Netherlands |                      |                         |                     |                         |
| Height          | 0.19                 | 0.13, 0.25              | 0.37                | 0.28, 0.46              |
| Leg length      | 0.22                 | 0.17, 0.27              | 0.24                | 0.12, 0.36              |
| Greece          |                      |                         |                     |                         |
| Height          | 0.31                 | 0.23, 0.38              | 0.13                | 0.02, 0.24              |
| Leg length      | 0.29                 | 0.23, 0.35              | 0.18                | 0.10, 0.26              |
| Germany         |                      |                         |                     |                         |
| Height          | 0.32                 | 0.25, 0.38              | 0.37                | 0.30, 0.43              |
| Leg length      | 0.27                 | 0.22, 0.32              | 0.37                | 0.32, 0.41              |
| Sweden          |                      |                         |                     |                         |
| Height          | 0.28                 | 0.21, 0.35              | 0.26                | 0.12, 0.41              |
| Denmark         |                      |                         |                     |                         |
| Height          | 0.29                 | 0.24, 0.34              | 0.37                | 0.23, 0.51              |
| Leg length      | 0.30                 | 0.26, 0.33              | 0.30                | 0.20, 0.40              |
| Total           |                      |                         |                     |                         |
| Height          | 0.31                 | 0.30, 0.33              | 0.39                | 0.36, 0.41              |
| Leg length      | 0.30                 | 0.28, 0.31              | 0.38                | 0.36, 0.41              |

\*  $\beta$  coefficient showing the number of centimeters taller in height or longer in leg length per year later at menarche.

3 months' decrease in 30 years that we found in our study for the United Kingdom.

We found that height has been increasing by approximately 0.7 cm per 5-year birth cohort in women born between 1915 and 1965. Hauspie et al. (8) reported an increase in adult stature of between 0.3 and 1.3 cm per decade in European countries since 1950, which is slightly lower compared with our findings. However, the time periods included in the study of Hauspie et al. were not birth years, which makes their results difficult to compare with ours.

The observed trends in age at menarche and adult height are probably caused by changes in the nutritional, hygienic, and health status of Western populations (8, 9, 24, 25). Nutrition, in particular, appears to play an important role in the onset of menarche. There is a vast amount of literature reporting that girls with higher body weight, higher body mass index, more body fat, and greater height reach their

menarche earlier (15, 26–31). Furthermore, it has been suggested that girls need to reach a critical weight or height for menarche to occur and that changes in dietary habits as observed in children may have caused this critical weight to be reached at an earlier age (1, 8, 29, 32). Up to now it is unclear, however, whether energy intake or specific nutritional components play a role, or whether nutrition affects menarche through its effect on accumulation of adipose tissue (29–31, 33).

The present study suggests that the trend in age at menarche has leveled off or has even reversed, as was found in other studies (8, 9, 11). Moreover, in some countries, the secular trend in height has started to level off in our data. This was also seen in other studies, although not as clearly as in the present study (8, 9, 14).

Our results support the general belief that women who reach their menarche at a later age will eventually grow

taller compared with women who reach their menarche at an earlier age. This relation may be explained by the earlier closure of epiphyseal growth disks because of the increase in ovarian estrogens (18, 19). A delay in menarche allows more growth of the long bones before the epiphyses unite and results in a taller adult height. Therefore, the menarcheal age probably has its main effect on height in the long bones. Leg length might, therefore, be a more appropriate outcome than total body height, even more since leg length is stable even if shrinkage appears in older women. Our results confirm this, as the effect of age at menarche on leg length is comparable to the effect on total body height. So, for each year of delay in when a woman reaches menarche, she will grow approximately 0.35 cm taller in total body height. This increase is fully caused by an increase in leg length, which was also approximately 0.35 cm.

Although the association between age at menarche and adult height is quite strong in this study, only a small part of the variation in height is explained by the variation in menarcheal age (about 1 percent in this study). Most of the variation in height was explained by country of residence (13 percent).

In all participating countries, age at menarche decreased over time, and the adult height increased. In addition, in all participating countries, the adult height increased with each additional year that menarche occurred later. Despite these similarities, there were also some differences among the participating countries. Historical differences, such as war influences, may play a role. All countries participating in this study, except Spain and Sweden, were involved in World War II, but only the Netherlands and Germany (after the latter's capitulation) suffered from severe famine as a result of the war. Our data show a strong increase in age at menarche for women aged approximately 10–20 years during World War II in the Netherlands and a few years later in Germany and France. Others already showed that World War II postponed age at menarche (22) and led to shorter adult height (23). As a result of this influence, the relation between age at menarche and adult height might be obscured. We, indeed, found a weaker relation between age at menarche and height for women born before, compared with women born during or after, 1945.

The linear relation between age at menarche and adult height was smaller in Greek women born during or after 1945 compared with women born before 1945. We do not have a clear explanation for this exception. During World War II and the Greek Civil War, which immediately followed World War II, Greece suffered from severe famine and poverty that lasted until 1949. It might be that women exposed to this period of famine and poverty had later menarche and remained smaller. This would dilute the relation between age at menarche and adult height.

In Spain, the Civil War that took place from 1936 to 1939 also resulted in famine in the years after the war (1940–1952). In this study, we see no clear effects of this war, which may be explained by the fact that only parts of Spain were involved in the war.

Furthermore, in France, height was self-reported instead of measured. It is known that women tend to overestimate their height (21). Overestimation of height is more common

in shorter and in older women. With aging, women tend to lose height, mainly because of changes in the spinal vertebral bodies and disk spaces (34). We observed that the oldest women were the shortest. In case older women have overestimated their height, their measured height will in reality be even shorter, and observed trends in France will then be stronger than those observed in this study.

As already noted in the paragraphs above, in most countries the relation between age at menarche and height was stronger for younger than for older women. Apart from famine influences, we also have to consider misclassification as an explanation for this phenomenon. One may argue that younger women may report menarcheal age more accurately, because the event was more recent. In the French cohort, there are data on 549 women who answered the question on age at menarche twice with an 18-month interval. Of these women, 70.7 percent reported an identical age at first menstruation, and 98.5 percent reported an age at menarche within a year of that initially reported. These percentages did not differ for older compared with younger women (13). Must et al. (35) were able to compare the actual measured age at menarche and the reported age 33 years later. They showed that the actual mean age at menarche did not differ from the recalled mean age at menarche (12.93 years (95 percent confidence interval: 12.81, 13.06) vs. 12.85 years (95 percent confidence interval: 12.69, 13.00)). Moreover, any misclassification was not dependent on the age at menarche (35). Although misclassification of age at menarche in our study is likely, these reports do not support the existence of age-dependent differential misclassification.

Analyses were adjusted for age at intake and socioeconomic status. Unfortunately, the EPIC does not have information on childhood nutrition. Nutrition may influence the onset of menarche as well as height, and information would have made it possible to more thoroughly study the associations. We used socioeconomic status as an approximation for childhood nutrition. In fact, we used “highest education” as a proxy for socioeconomic status in childhood. Whether highest education reflects socioeconomic status correctly may depend on the age of a woman as well as on country. Therefore, we also analyzed trends without adjustment for socioeconomic status. For height, all countries showed more pronounced trends. For age at menarche, trends were on average quite similar, with the exceptions of Greece, where the trend was more pronounced ( $\beta = -0.12$  vs.  $\beta = -0.07$ ), and of the Netherlands, where the trend was less pronounced ( $\beta = -0.06$  vs.  $\beta = -0.11$ ).

In summary, we found that the mean age at menarche has decreased from 1920 onward by approximately 0.1 year per 5-year birth cohort in nine Western European countries. The mean adult height has increased by approximately 0.7 cm per 5-year birth cohort during the same period. For both age at menarche and adult height, we found that the trends are leveling off in some countries. An increase in adult height and a decrease in age at menarche will probably partly explain increases in breast cancer incidence in several countries.

Despite the inverse relation on an ecologic (population) trend level, the analyses show that earlier age at menarche in individuals is related to shorter adult height. The latter may



appear contradictory to the known effects of age at menarche and height on breast cancer risk. It is likely, however, that these risk factors affect breast cancer risk through different pathways. Early menarche may lead to an increased lifetime exposure to endogenous sex hormones, which may cause an increased risk of breast cancer (36–38). Taller adult height, on the other hand, is positively associated with high levels of growth hormone and insulin-like growth factor I and might be a reflection of increased growth hormone/insulin-like growth factor I activity during childhood, which is also hypothesized to increase breast cancer risk (32, 39, 40).

## ACKNOWLEDGMENTS

The work described in the paper was carried out with the financial support of the “Europe against Cancer” Program of the European Commission (SANCO); Ligue contre le Cancer (France); Société 3M (France); Mutuelle Générale de l’Education Nationale; Institut National de la Santé et de la Recherche Médicale (INSERM); German Cancer Aid; German Cancer Research Center; German Federal Ministry of Education and Research; Danish Cancer Society; Health Research Fund (FIS) of the Spanish Ministry of Health; the participating regional governments and institutions of Spain; Cancer Research United Kingdom; Medical Research Council, United Kingdom; the Stroke Association, United Kingdom; British Heart Foundation; Department of Health, United Kingdom; Food Standards Agency, United Kingdom; the Wellcome Trust, United Kingdom; Greek Ministry of Health; Greek Ministry of Education; Italian Association for Research on Cancer (AIRC), Milan, Italy; Compagnia di San Pablo; Dutch Ministry of Public Health, Welfare, and Sports; Dutch Ministry of Health; Dutch Prevention Funds; LK Research Funds; Dutch Zorg Onderzoek Nederland (ZON); World Cancer Research Fund; Swedish Cancer Society; Swedish Scientific Council; Regional Government of Skane, Sweden; and the Norwegian Cancer Society. The first author (N. C. O-M.) of this paper was supported by the Dutch Cancer Society (grant UU 1999-1935).

Conflict of interest: none declared.

## REFERENCES

1. Baanders AN, de Waard F. Breast cancer in Europe: the importance of factors operating at an early age. *Eur J Cancer* 1992;1:285–91.
2. Berkey CS, Frazier AL, Gardner JD, et al. Adolescence and breast cancer risk. *Cancer* 1999;85:2400–9.
3. Hsieh CC, Trichopoulos D, Katsouyanni K, et al. Age at menarche, age at menopause, height and obesity as risk factors for breast cancer: associations and interactions in an international case-control study. *Int J Cancer* 1990;46:796–800.
4. Key TJ, Verkasalo PK, Banks E. Epidemiology of breast cancer. *Lancet Oncol* 2001;2:133–40.
5. Peeters PH, Verbeek AL, Krol A, et al. Age at menarche and breast cancer risk in nulliparous women. *Breast Cancer Res Treat* 1995;33:55–61.
6. Clavel-Chapelon F, Gerber M. Reproductive factors and breast cancer risk. Do they differ according to age at diagnosis? *Breast Cancer Res Treat* 2002;72:107–15.
7. van den Brandt PA, Spiegelman D, Yaun SS, et al. Pooled analysis of prospective cohort studies on height, weight, and breast cancer risk. *Am J Epidemiol* 2000;152:514–27.
8. Hauspie RC, Vercouteren M, Susanne C. Secular changes in growth and maturation: an update. *Acta Paediatr Suppl* 1997;423:20–7.
9. Cole TJ. Secular trends in growth. *Proc Nutr Soc* 2000;59:317–24.
10. Whincup PH, Gilg JA, Odoki K, et al. Age of menarche in contemporary British teenagers: survey of girls born between 1982 and 1986. *BMJ* 2001;322:1095–6.
11. Roberts DF, Dann TC. A 12-year study of menarcheal age. *Br J Prev Soc Med* 1975;29:31–9.
12. Okasha M, McCarron P, McEwen J, et al. Age at menarche: secular trends and association with adult anthropometric measures. *Ann Hum Biol* 2001;28:68–78.
13. Clavel-Chapelon F, E3N-EPIC group. Evolution of age at menarche and at onset of regular cycling in a large cohort of French women. *Hum Reprod* 2002;17:228–32.
14. Cavelaars AE, Kunst AE, Geurts JJ, et al. Persistent variations in average height between countries and between socio-economic groups: an overview of 10 European countries. *Ann Hum Biol* 2000;27:407–21.
15. Koprowski C, Ross RK, Mack WJ, et al. Diet, body size and menarche in a multiethnic cohort. *Br J Cancer* 1999;79:1907–11.
16. Sharma K, Talwar I, Sharma N. Age at menarche in relation to adult body size and physique. *Ann Hum Biol* 1988;15:431–4.
17. Shangold MM, Kelly M, Berkeley AS, et al. Relationship between menarcheal age and adult height. *South Med J* 1989;82:443–5.
18. Georgiadis E, Mantzoros CS, Evagelopoulou C, et al. Adult height and menarcheal age of young women in Greece. *Ann Hum Biol* 1997;24:55–9.
19. Helm P, Munster K, Schmidt L. Recalled menarche in relation to infertility and adult weight and height. *Acta Obstet Gynecol Scand* 1995;74:718–22.
20. Riboli E, Hunt KJ, Slimani N, et al. European Prospective Investigation into Cancer and Nutrition (EPIC): study populations and data collection. *Public Health Nutr* 2002;5:1113–24.
21. Haftenberger M, Lahmann PH, Panico S, et al. Overweight, obesity and body fat distribution in individuals aged 50 to 64 years involved in the European Prospective Investigation into Cancer and Nutrition (EPIC). *Public Health Nutr* 2002;5:1147–62.
22. van Noord PA, Kaaks R. The effect of wartime conditions and the 1944–45 ‘Dutch famine’ on recalled menarcheal age in participants of the DOM breast cancer screening project. *Ann Hum Biol* 1991;18:57–70.
23. Dahlmann N, Petersen K. Influences of environmental conditions during infancy on final body stature. *Pediatr Res* 1977;11:695–700.
24. Berkey CS, Gardner JD, Frazier AL, et al. Relation of childhood diet and body size to menarche and adolescent growth in girls. *Am J Epidemiol* 2000;152:446–52.
25. Rogol AD. Early menarche and adult height: reprise of the hare and the tortoise? *J Pediatr* 2001;138:617–18.
26. Petridou E, Syrigou E, Toupadaki N, et al. Determinants of age at menarche as early life predictors of breast cancer risk. *Int J Cancer* 1996;68:193–8.

27. Meyer F, Moisan J, Marcoux D, et al. Dietary and physical determinants of menarche. *Epidemiology* 1990;1:377–81.
28. Moisan J, Meyer F, Gingras S. A nested case-control study of the correlates of early menarche. *Am J Epidemiol* 1990;132:953–61.
29. Maclure M, Travis LB, Willett W, et al. A prospective cohort study of nutrient intake and age at menarche. *Am J Clin Nutr* 1991;54:649–56.
30. Merzenich H, Boeing H, Wahrendorf J. Dietary fat and sports activity as determinants for age at menarche. *Am J Epidemiol* 1993;138:217–24.
31. Moisan J, Meyer F, Gingras S. Diet and age at menarche. *Cancer Causes Control* 1990;1:149–54.
32. Stoll BA. Western diet, early puberty, and breast cancer risk. *Breast Cancer Res Treat* 1998;49:187–93.
33. Kissinger DG, Sanchez A. The association of dietary factors and age at menarche. *Nutr Res* 1987;7:471–9.
34. Sagiv M, Vogelaere PP, Soudry M, et al. Role of physical activity training in attenuation of height loss through aging. *Gerontology* 2000;46:266–70.
35. Must A, Phillips SM, Naumova EN, et al. Recall of early menstrual history and menarcheal body size: after 30 years, how well do women remember? *Am J Epidemiol* 2002;155:672–9.
36. Trichopoulos D, Brown J, MacMahon B. Urine estrogens and breast cancer risk factors among post-menopausal women. *Int J Cancer* 1987;40:721–5.
37. MacMahon B, Cole P, Brown JB, et al. Urine estrogens, frequency of ovulation, and breast cancer risk: case-control study in premenopausal women. *J Natl Cancer Inst* 1983;70:247–50.
38. Key T, Appleby P, Barnes I, et al. Endogenous sex hormones and breast cancer in postmenopausal women: reanalysis of nine prospective studies. *J Natl Cancer Inst* 2002;94:606–16.
39. Stoll BA, Vatten LJ, Kvinnsland S. Does early physical maturity influence breast cancer risk? *Acta Oncol* 1994;33:171–6.
40. Wang DY, DeStavola BL, Allen DS, et al. Breast cancer risk is positively associated with height. *Breast Cancer Res Treat* 1997;43:123–8.
